# Supplementary material for: Synergistic effect of ROS-generating polydopamine on drug-induced bone tissue regeneration
Source: Royal Society of Chemistry journal article supplement (doi:10.1039/d4nr02887b), 2024-01-01
Supplement: d4nr02887b1.pdf [file d4nr02887b1.pdf]

## Supporting Information

### Synergistic Effect of ROS-Generating Polydopamine on Drug-Induced Bone Tissue Regeneration

Hyeju Han<sup>a,b,†</sup>, Bongkyun Kang<sup>b,†</sup>, Shazid Md. Sharker<sup>c</sup>, Tabassum Binte Kashem<sup>c</sup>, Yuejin Kim<sup>a,b</sup>, Jeehee Lee<sup>d</sup>, Minok Park<sup>e</sup>, Eunjeong Kim<sup>b,f</sup>, YunJae Jung<sup>g</sup>, Jinkyu Lim<sup>h\*</sup>, Seungwon Ryu<sup>g\*</sup>, Kyueui Lee<sup>a,b,i\*</sup>

<sup>a</sup>Department of Chemistry, Kyungpook National University, Daegu 41566, South Korea

<sup>b</sup>KNU Institute of Basic Sciences and KNU G-LAMP Project Group, Kyungpook National University, Daegu 41566, South Korea

<sup>c</sup>Department of Pharmaceutical Sciences, North South University, Dhaka 1229, Bangladesh

<sup>d</sup>Department of Orthopaedic Surgery, Stanford University School of Medicine, Stanford, CA 94305, USA

<sup>e</sup>Energy Technologies Area, Lawrence Berkeley National Laboratory, Berkeley, CA 94720, USA

<sup>f</sup>BK21 FOUR KNU Creative BioResearch Group, Department of Biology, College of Natural Sciences, Kyungpook National University, Daegu 41566, Republic of Korea

<sup>g</sup>Department of Microbiology, Gachon University College of Medicine, Incheon 21999, South Korea

<sup>h</sup>Department of Energy and Environmental Engineering, The Catholic University of Korea, Bucheon 14662, South Korea

<sup>i</sup>Biomedical Research Institute, Kyungpook National University Hospital, Daegu 41940, South Korea

<sup>†</sup>These authors equally contributed to this work.

\*Correspondence: [jinkyu@catholic.ac.kr](mailto:jinkyu@catholic.ac.kr) (J. Lim); [swryu@gachon.ac.kr](mailto:swryu@gachon.ac.kr) (S. Ryu); [kyueui@knu.ac.kr](mailto:kyueui@knu.ac.kr) (K. Lee)-mail

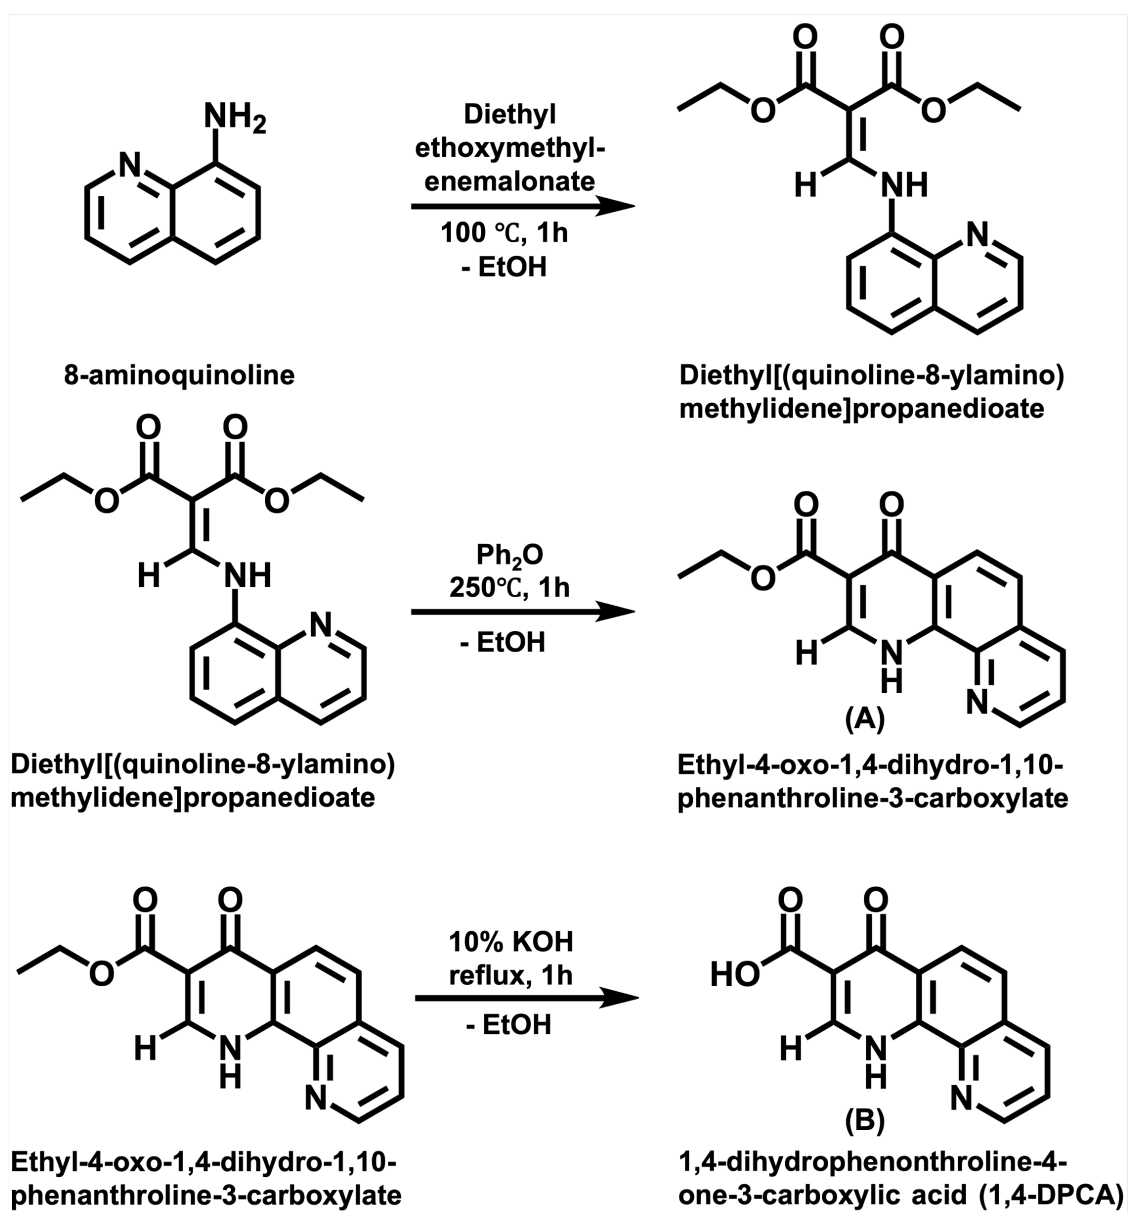

**Fig. S1.** Synthetic scheme of 1,4-DPCA. The synthesis was accomplished in two steps, and the two main products (A, B) are described here.

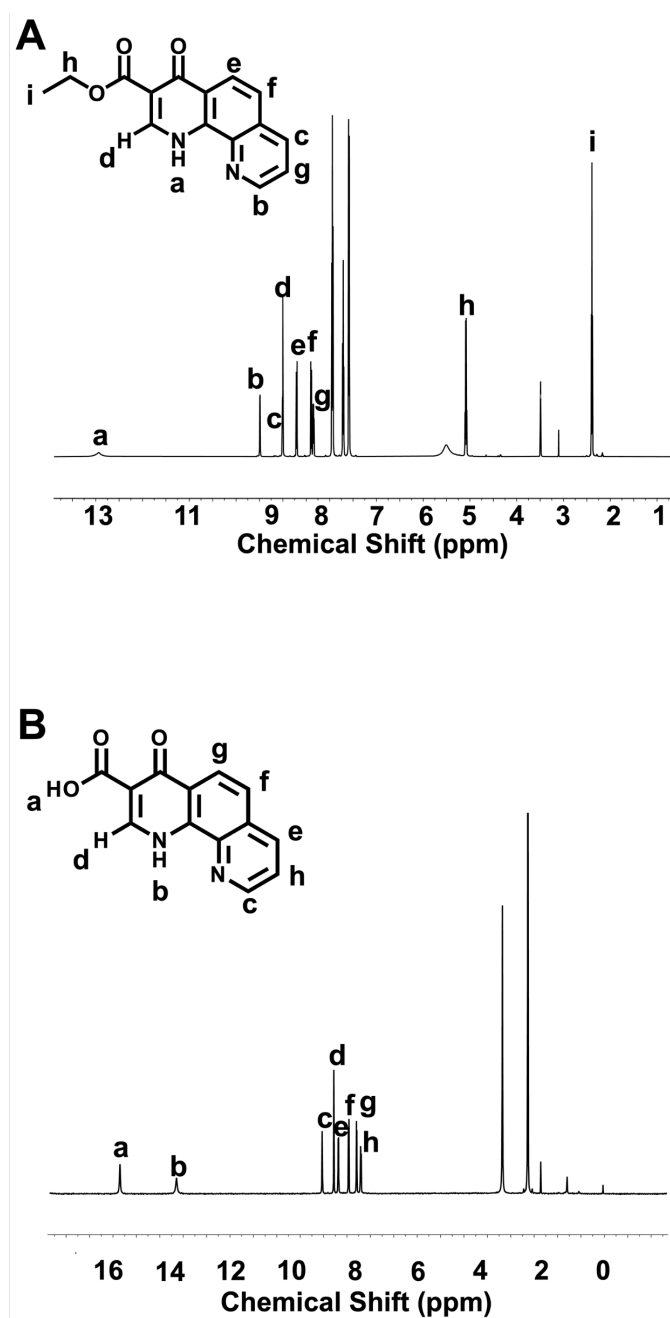

**Fig. S2.** (A) The intermediate compound, ethyl-4-oxo-1,4-dihydro-1,10-phenanthroline-3-carboxylate. <sup>1</sup>H NMR (500 MHz, DMSO-d<sub>6</sub>) δ 12.83 (d, J = 6.6 Hz, 1H), 9.06 (dd, J = 4.3, 1.7 Hz, 1H), 8.57 – 8.50 (m, 2H), 8.22 (d, J = 8.7 Hz, 1H), 7.86 (d, J = 8.9 Hz, 1H), 7.80 (dd, J = 8.3, 4.3 Hz, 1H), 4.25 (q, J = 7.1 Hz, 2H), 1.29 (t, J = 7.1 Hz, 3H). (B) 1,4-DPCA. <sup>1</sup>H NMR (500 MHz, DMSO-d<sub>6</sub>) δ 15.44 (s, 1H), 13.88 (s, 1H), 9.18 (dd, J = 4.2, 1.6 Hz, 1H), 8.77 (d, J = 6.4 Hz, 1H), 8.66 (dd, J = 8.3, 1.6 Hz, 1H), 8.31 (d, J = 8.8 Hz, 1H), 8.08 (d, J = 8.8 Hz, 1H), 7.94 (dd, J = 8.2, 4.2 Hz, 1H).

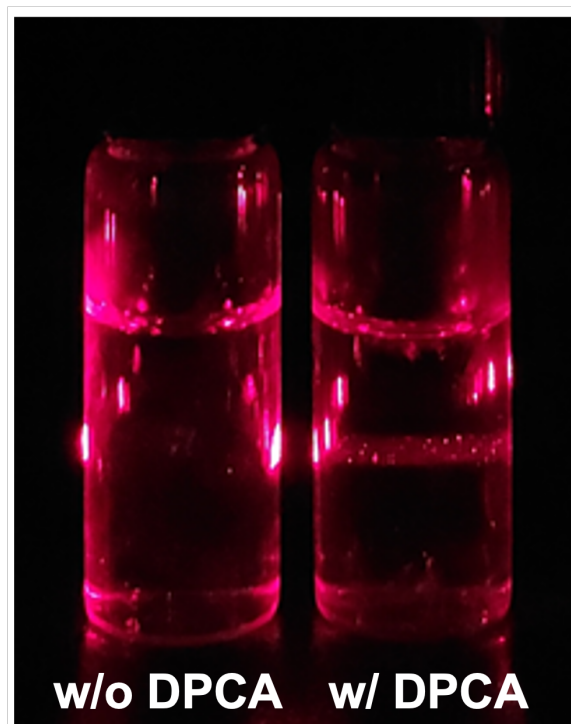

**Fig. S3.** Optical image demonstrating the Tyndall effect exhibited in the solution containing 1,4-DPCA aggregates.

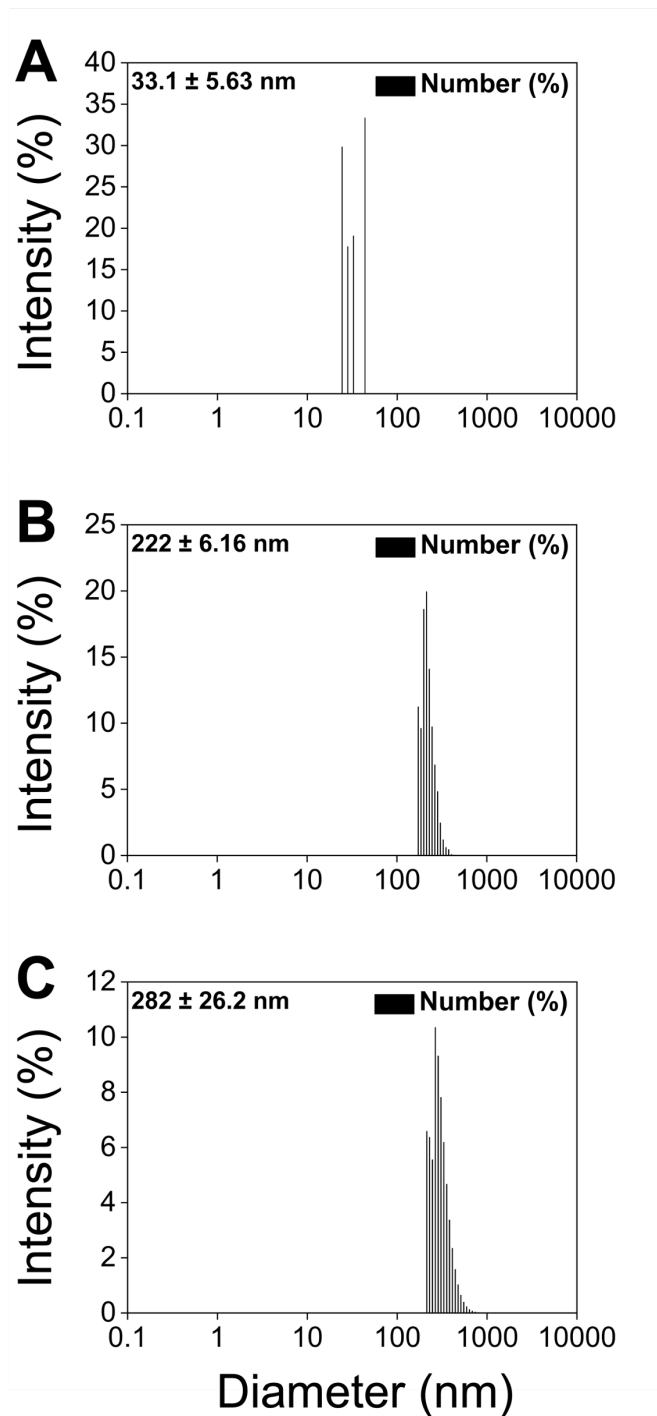

**Fig. S4.** Particle diameter distribution of (A) 1,4-DPCA drug aggregates, (B) polydopamine nanoparticles (PDA NPs), and (C) polydopamine nanoparticles loaded with 1,4-DPCA (PDA w/DPCA NPs).

|                           | Case 1                                                                                                 | Case 2                                                                |
|---------------------------|--------------------------------------------------------------------------------------------------------|-----------------------------------------------------------------------|
| <b>DDS Structure</b>      | Randomly-Distributed                                                                                   | Core-Shell                                                            |
| <b>Theoretical Value</b>  | [at% of -NH-]<br>PDA NPs = 58 at%<br>1,4-DPCA = 25%<br>DDS = (0.9 x 58) + (0.1 x 25) = <b>54.7 at%</b> | [at% of -NH-]<br>PDA NPs = 58 at%<br>DDS = (1.0 x 58) = <b>58 at%</b> |
| <b>Experimental Value</b> | <b>57 at%</b>                                                                                          |                                                                       |

**Table S1.** Comparison of theoretical and experimental atomic percentages of the -NH- bond for randomly distributed and core-shell structured DDS.

|                           | Case 1                                                                                              | Case 2                                                            |
|---------------------------|-----------------------------------------------------------------------------------------------------|-------------------------------------------------------------------|
| <b>DDS Structure</b>      | Randomly-Distributed                                                                                | Core-Shell                                                        |
| <b>Theoretical Value</b>  | [at% of O-C]<br>PDA NPs = 8 at%<br>1,4-DPCA = 41%<br>DDS = (0.9 x 8) + (0.1 x 41) = <b>11.3 at%</b> | [at% of O-C]<br>PDA NPs = 8 at%<br>DDS = (1.0 x 8) = <b>8 at%</b> |
| <b>Experimental Value</b> | <b>7 at%</b>                                                                                        |                                                                   |

**Table S2.** Comparison of theoretical and experimental atomic percentages of the O-C bond for randomly distributed and core-shell structured DDS.

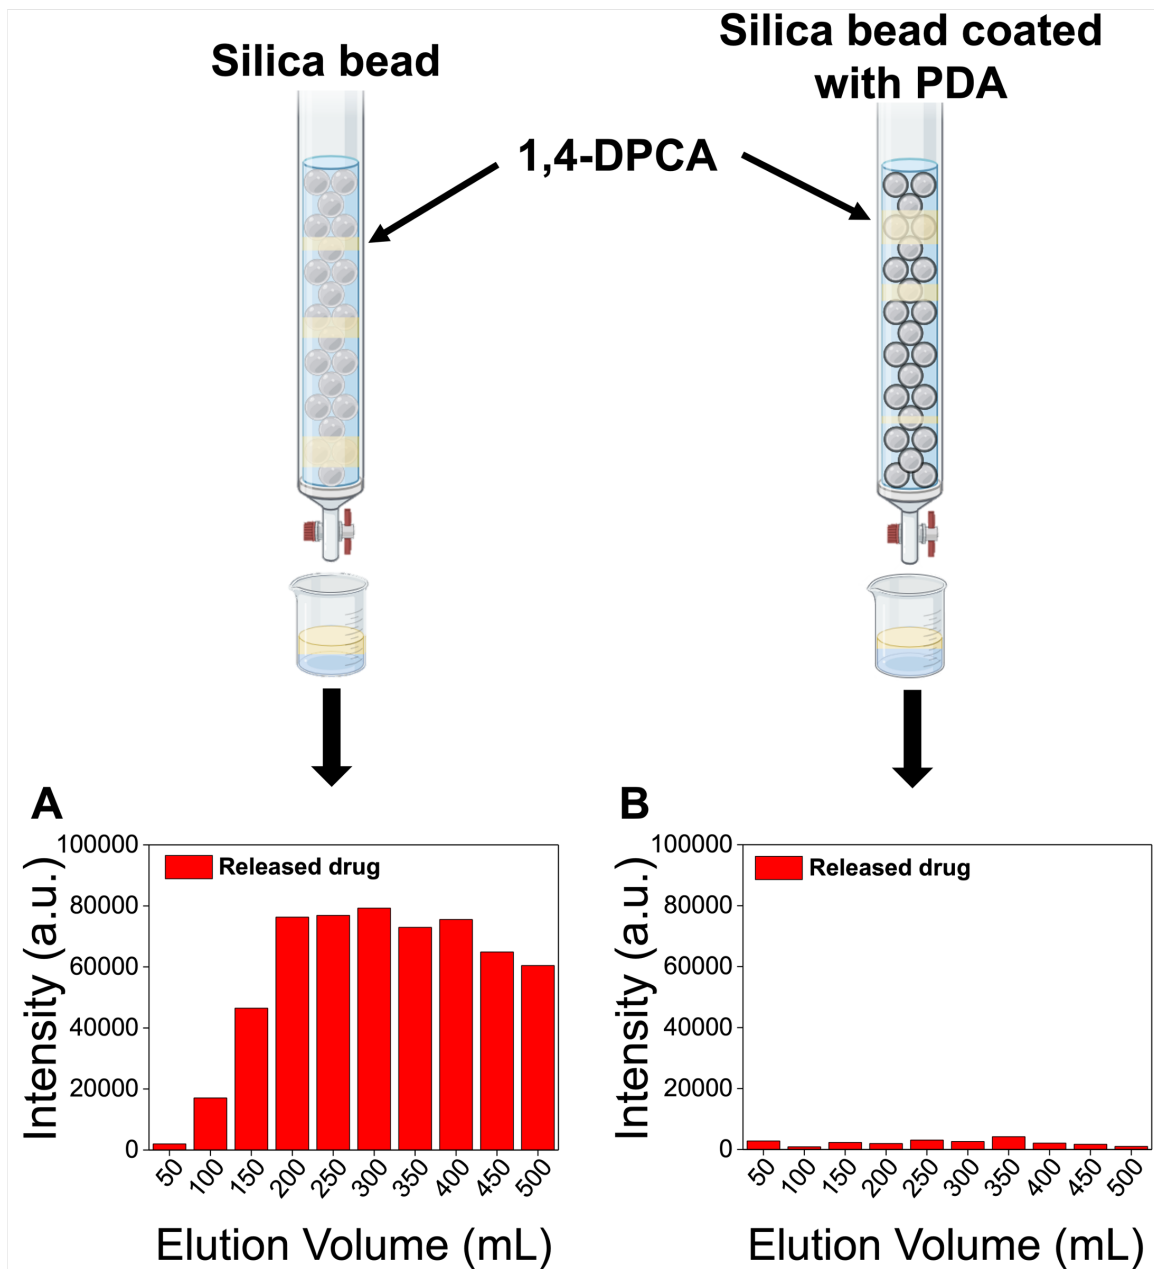

**Fig. S5.** The amount of drug released from a column filled with (A) silica beads and (B) silica beads coated with PDA was measured by high-performance liquid chromatography. a.u. indicates arbitrary unit.

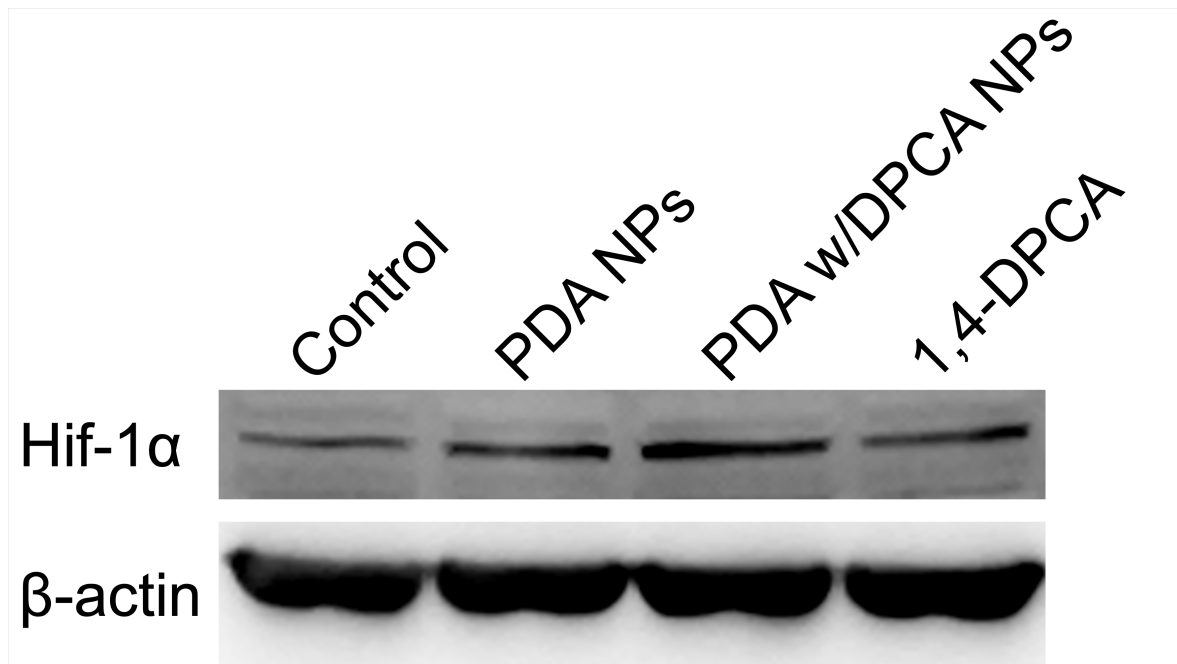

**Fig. S6.** Western blot analysis showing the expression levels of Hif-1 $\alpha$  in different treatment groups. MC3T3-E1 cells were treated with control (untreated), PDA NPs, PDA w/DPCA NPs, and 1,4-DPCA, as indicated. Hif-1 $\alpha$  levels were detected using specific antibodies, with  $\beta$ -actin used as a loading control.



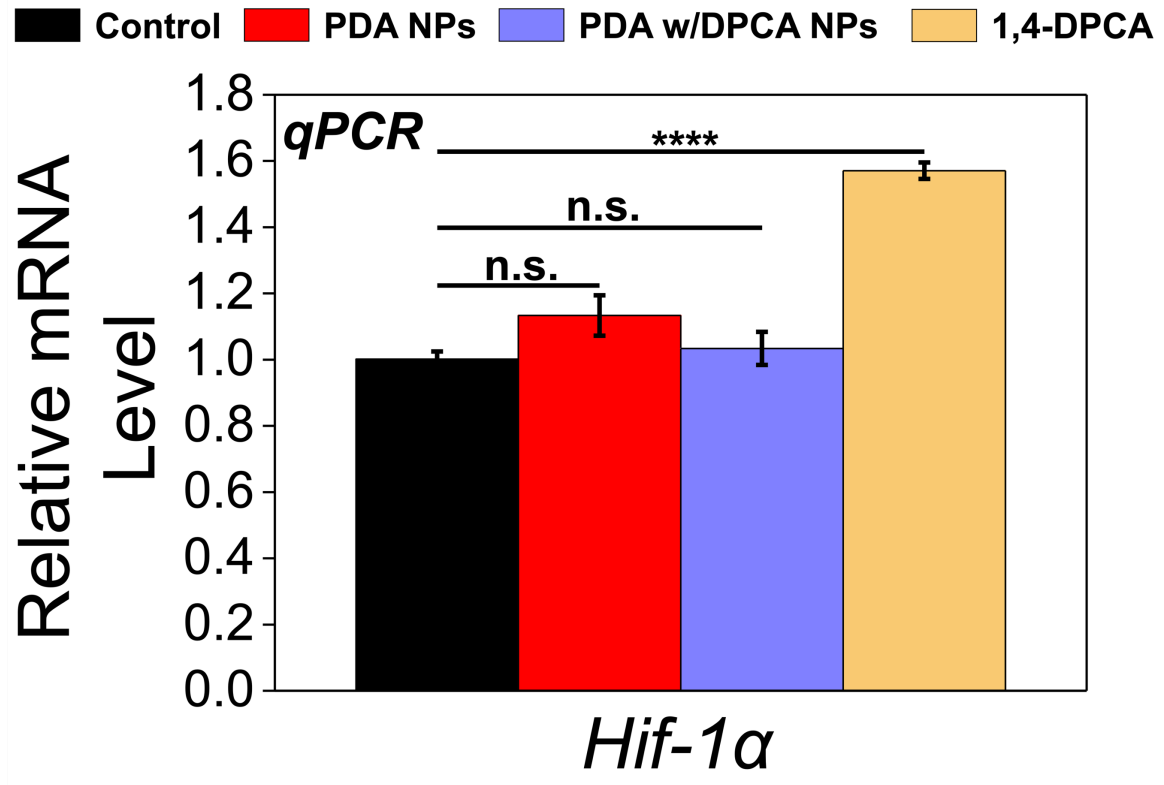

**Fig. S7.** Relative *Hif-1α* mRNA expression in MC3T3-E1 cells treated with PDA NPs, PDA w/DPCA NPs, and 1,4-DPCA, assessed using RT-qPCR (n = 6). Asterisks indicate statistical significance (p-values): \*\*\*\* represents  $p \leq 0.0001$ , and n.s. = not significant.

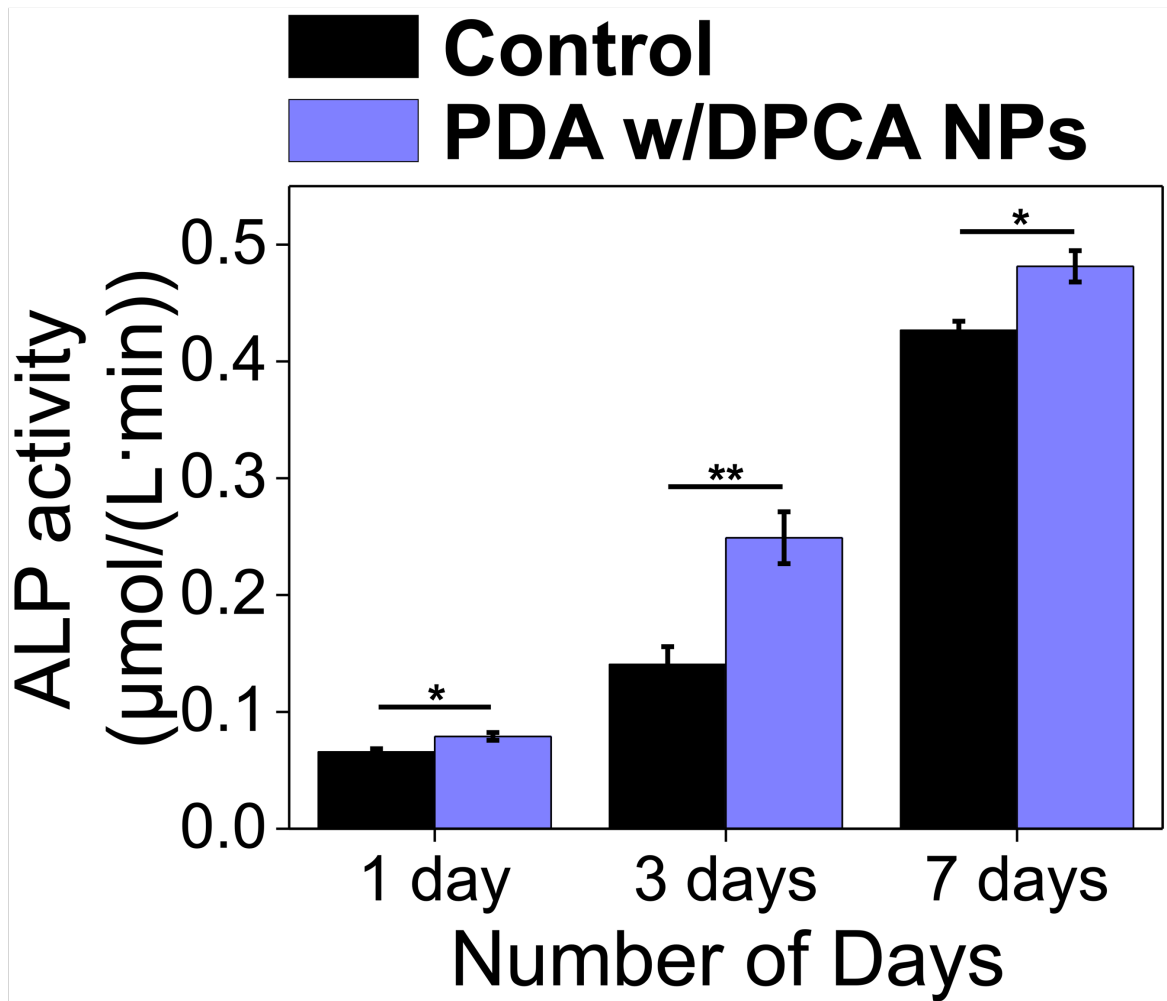

**Fig. S8.** Alkaline phosphatase (ALP) activity assay: reported values are presented as the mean  $\pm$  SD, and the assay was performed after 1, 3, and 7 days of culture ( $n = 4$ ). The area of tissue regeneration is indicated by a black dotted line. \* $p \leq 0.05$ , \*\* $p \leq 0.01$ , n.s. = not significant.

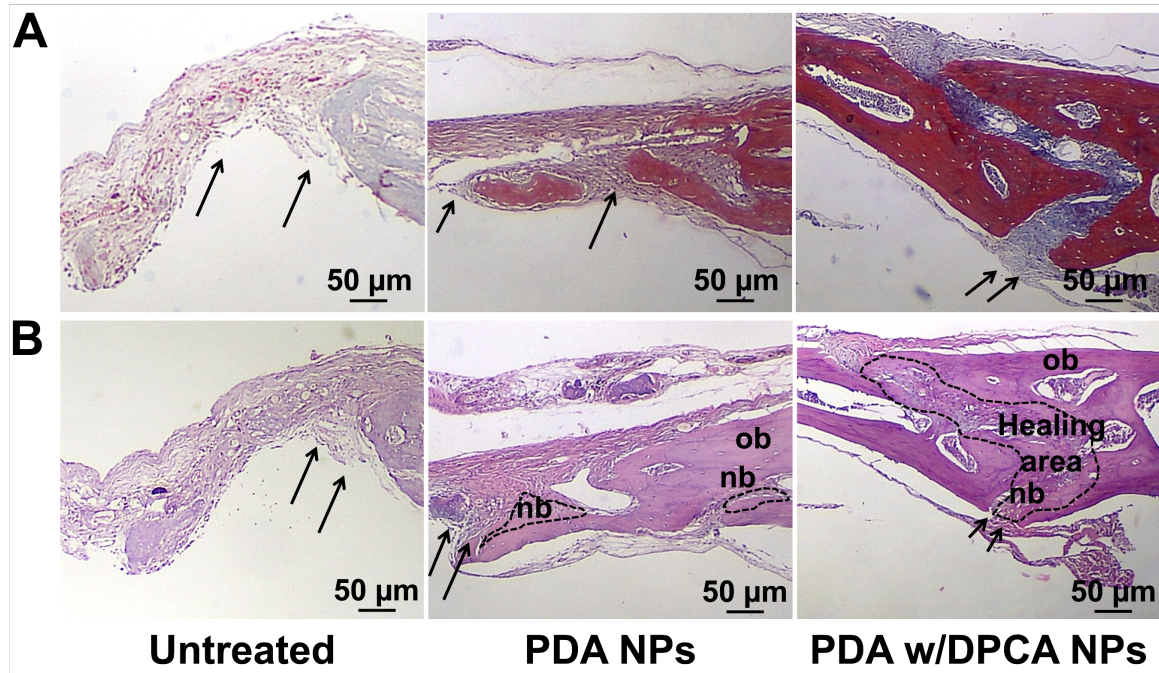

**Fig. S9.** (A) Representative MT staining images of the calvarial bone defect sections from each group. Scale bar = 50  $\mu\text{m}$ . (B) Representative H&E staining images of calvarial bone defect sections from animals in the untreated, and PDA NPs and PDA w/DPCA NPs treated groups. The arrow sign shows the defect site; “ob” indicates old bone, and “nb” indicates new bone.
