# Supplementary figures and images for: Synergistic effect of ROS-generating polydopamine on drug-induced bone tissue regeneration
Source: Royal Society of Chemistry journal article supplement (doi:10.1039/d4nr02887b), 2024-01-01

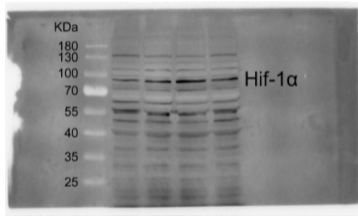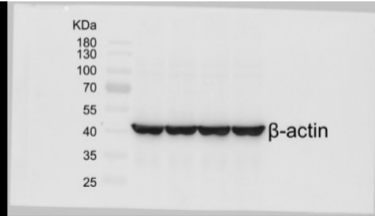

Supplement: d4nr02887b2.pdf [file d4nr02887b2.pdf]
